# Supplementary material for: Phosphites as ligands in ruthenium-benzylidene catalysts for olefin metathesis
Source: Royal Society of Chemistry journal article supplement (doi:10.1039/c1cc10825e), 2011-01-01
Supplement: c1cc10825e.pdf [file c1cc10825e.pdf]

*Supporting Information*  
*for*  
**Phosphites as Ligands in Ruthenium-Benzylidene  
Catalysts for Olefin Metathesis**

Thibault E. Schmid, Xavier Bantreil, Cécilia Citadelle, Alexandra M. Z. Slawin and Catherine S. J. Cazin\*

*School of Chemistry University of St Andrews St Andrews, UK, KY16 9ST*  
*Fax: (+)44 (0) 1334 463808*  
*E-mail: [cc111@st-andrews.ac.uk](mailto:cc111@st-andrews.ac.uk)*

**Contents**

|                                                                                                                                       |     |
|---------------------------------------------------------------------------------------------------------------------------------------|-----|
| <b>General Information</b> .....                                                                                                      | S2  |
| <b>Substrate synthesis</b> .....                                                                                                      | S2  |
| 1-(2-methylallyloxy)prop-2-yne-1,1-diyl)dibenzene ( <b>24</b> ) .....                                                                 | S2  |
| <b>Procedures for Catalysis</b> .....                                                                                                 | S2  |
| Procedure for Figure 3 – Kinetic study of the catalysts .....                                                                         | S2  |
| General procedure for the metathesis reaction – Tables 1 and 2 .....                                                                  | S3  |
| <b>Synthesis of the pre-catalysts</b> .....                                                                                           | S4  |
| Dichloro- $\{N,N'$ -bis[2,4,6-(trimethyl)phenyl]imidazolin-2-ylidene\}(benzylidene)(triisopropylphosphite) ruthenium, <b>1a</b> ..... | S4  |
| Dichloro- $\{N,N'$ -bis[2,4,6-(trimethyl)phenyl]imidazolin-2-ylidene\}(benzylidene)(triethylphosphite) ruthenium, <b>1b</b> .....     | S4  |
| <b>NMR spectra of the complexes</b> .....                                                                                             | S5  |
| $^1\text{H}$ NMR ( $\text{CDCl}_3$ ) of <b>1a</b> .....                                                                               | S5  |
| $^{13}\text{C}$ - $\{^1\text{H}\}$ NMR ( $\text{CD}_2\text{Cl}_2$ ) of <b>1a</b> .....                                                | S5  |
| $^{31}\text{P}$ - $\{^1\text{H}\}$ NMR ( $\text{CDCl}_3$ ) of <b>1a</b> .....                                                         | S6  |
| $^1\text{H}$ NMR ( $\text{CD}_2\text{Cl}_2$ ) of <b>1b</b> .....                                                                      | S6  |
| $^{13}\text{C}$ - $\{^1\text{H}\}$ NMR ( $\text{CD}_2\text{Cl}_2$ ) of <b>1b</b> .....                                                | S7  |
| $^{31}\text{P}$ - $\{^1\text{H}\}$ NMR ( $\text{CD}_2\text{Cl}_2$ ) of <b>1b</b> .....                                                | S7  |
| <b>NMR spectra of the metathesis products</b> .....                                                                                   | S8  |
| <b>References</b> .....                                                                                                               | S15 |

## General Information

All reactions were performed under an inert atmosphere of argon or nitrogen using standard Schlenk and/or glovebox techniques. Solvents were dispensed from a solvent purification system. All other reagents were used without further purification.  $^1\text{H}$ ,  $^{13}\text{C}$ - $\{^1\text{H}\}$  and  $^{31}\text{P}$ - $\{^1\text{H}\}$  1D and 2D Nuclear Magnetic Resonance (NMR) spectra were recorded on a Bruker AVANCE 400 Ultrashield spectrometer using the residual solvent peak as reference ( $\text{CHCl}_3$ :  $\delta_{\text{H}} = 7.26$  ppm,  $\delta_{\text{C}} = 77.16$  ppm;  $\text{CH}_2\text{Cl}_2$ ,  $\delta_{\text{H}} = 5.32$  ppm,  $\delta_{\text{C}} = 54.00$  ppm) at 298K. Gas chromatography (GC) analyses were performed on an Agilent 7890A apparatus equipped with a flame ionization detector and a (5%-Phenyl)-methylpolysiloxane column (30 m, 320  $\mu\text{m}$ , film: 0.25  $\mu\text{m}$ ). Flash chromatography was conducted using 40-63  $\mu\text{m}$  silica. Analytical TLCs were performed on Merck pre-coated silica 60-F<sub>254</sub> plates. Elemental analyses were performed by the University of St Andrews Analytical Services.

## Substrate synthesis

### {1-(2-methylallyloxy)prop-2-yne-1,1-diyl}dibenzene (24)

To a suspension of sodium hydride (95%, 0.63g, 25 mmol), in dry DMF (50mL) at 0°C, 1,1-diphenyl-2-propyn-1-ol (5.21g, 25 mmol) was added portion wise. 15 min after the end of the gas evolution, 2-chloro-2-methylprop-1-ene (3.7 mL, 37.5 mmol) was added dropwise and the resulting mixture was stirred at room temperature for 3 h. The reaction was then quenched by addition of water and  $\text{Et}_2\text{O}$  was added. The organic layer was washed with a saturated solution of sodium carbonate and brine, and dried over sodium sulfate, filtered and concentrated *in vacuo*. The crude mixture was purified by flash chromatography (pentane/EtOAc 95:5) to afford the title compound as a pale yellow oil (2.149 g, 33%).

$^1\text{H}$  NMR ( $\text{CDCl}_3$ , 300 MHz, 298K)  $\delta_{\text{H}}$  (ppm) = 1.87 (s, 3H,  $\text{CH}_3$ ), 2.95 (s, 1H,  $\text{C}\equiv\text{CH}$ ), 4.02 (s, 1H,  $\text{CH}_2$ ), 4.99 (br. s, 1H,  $\text{C}=\text{CH}$ ), 5.20 (br. s, 1H,  $\text{C}=\text{CH}$ ), 7.30-7.42 (m, 6H, Ph), 7.66-7.70 (m, 4H, Ph);  $^{13}\text{C}$ - $\{^1\text{H}\}$  NMR ( $\text{CDCl}_3$ , 75.5 MHz, 298 K)  $\delta_{\text{C}}$  (ppm) = 20.1, 68.6, 77.8, 80.0, 83.4, 111.4, 126.7, 127.8, 128.3, 142.4, 143.4; HRMS (CI) calcd.  $\text{C}_{19}\text{H}_{19}\text{O}$ : (M + H)<sup>+</sup>, 263.1430; found: (M + H)<sup>+</sup>, 263.1433.

## Procedures for catalysis

Substrates **4**<sup>1</sup>, **6**<sup>2</sup>, **8**<sup>3</sup>, **10**<sup>4</sup>, **12**<sup>5</sup>, **14**<sup>5</sup>, **16**<sup>6</sup>, **18**<sup>4</sup>, **20**<sup>2</sup>, **22**<sup>2</sup>, **26**<sup>7</sup> and **28**<sup>8</sup> were synthesised according to literature procedures. Compound **2** and methyl acrylate were obtained from commercial sources. NMR spectra of the RCM products **3**<sup>2</sup>, **5**<sup>2</sup>, **7**<sup>2</sup>, **9**<sup>2</sup>, **11**<sup>2</sup>, **13**<sup>2</sup>, **15**<sup>2</sup>, **17**<sup>2</sup>, **19**<sup>2</sup>, **21**<sup>2</sup>, **23**<sup>2</sup>, **25**<sup>9</sup> and CM products **27**<sup>10</sup> and **29**<sup>11</sup> were compared to previously reported analyses.

### Procedure for Figure 3 – Kinetic study of the catalysts

In a glovebox, to a Schlenk flask charged with diallyl malonate (60.1 mg, 0.25 mmol), 0.5 mL of a Ru pre-catalyst solution (1 mol% in 1 mL  $\text{CH}_2\text{Cl}_2$ ) was added, followed by addition of 2 mL of  $\text{CH}_2\text{Cl}_2$ . Outside the glovebox, the reaction mixture was stirred under an Argon atmosphere. An aliquot was removed every 10 min for a period of 2 h. The aliquot was immediately quenched with ethyl vinyl ester after removal from reaction flask. Evolution of the reaction was followed by gas chromatography and conversion was determined by integral ratios.

### **General procedure for the metathesis reaction – Tables 1 and 2**

A 5 mL screwcap-vial fitted with a septum equipped with a magnetic stirring bar was charged with the olefin (0.25 mmol) and the catalyst (for loadings  $\geq 1$  mol %). The vials were flushed with Argon, closed and were introduced into a glovebox. For loadings  $\leq 1$  mol %, a stock solution of the pre-catalyst was prepared by dissolution in 1 mL of solvent and the appropriate volume of catalyst stock solution was injected into the reaction vial containing a solution of the substrate (total volume of 0.5 mL, 0.5 M solution with respect to substrate); for catalyst loadings  $\geq 1$  mol %, 0.5 mL of solvent was added to the reaction vial. The reaction mixture was heated at the appropriate temperature for 8 hours. The solvent was then evaporated and the resulting product was analysed by gas chromatography (conversion determined by integrals ratios) and/or purified by flash chromatography.

## Synthesis of the pre-catalysts

A Schlenk flask was charged with  $[\text{RuCl}_2(=\text{CHPh})(\text{Py})_2(\text{SIMes})]$  (**G-III**), dichloromethane (5 mL) and  $\text{P}(\text{OR})_3$  (1.1 eq.) were added. The reaction was stirred 1 h at room temperature and the solvent removed *in vacuo*. The resulting solid was washed with cold pentane and dried *in vacuo* to afford the analytically pure product. Quality crystals were grown by cooling of a saturated solution of the complexes in pentane at  $-35^\circ\text{C}$ .

### Dichloro- $\{N,N'$ -bis[2,4,6-(trimethyl)phenyl]imidazolin-2-ylidene\}(benzylidene) (triisopropylphosphite) ruthenium (1a)

Using 500mg of **G-III** (0.688 mmol), the procedure afforded 414.9 mg (78%) of the analytically pure product as a green powder.

$^1\text{H}$  NMR ( $\text{CDCl}_3$ , 300 MHz, 298K)  $\delta$  (ppm) = 0.90 (d,  $^3J_{\text{H-H}} = 6.0$  Hz, 18H,  $\text{CH-CH}_3$ ), 2.07 (s, 3H, Mes- $\text{CH}_3$ ), 2.26 (s, 6H, Mes- $\text{CH}_3$ ), 2.32 (s, 3H, Mes- $\text{CH}_3$ ), 2.68 (s, 6H, Mes- $\text{CH}_3$ ), 3.88-4.10 (m, 7H,  $\text{C}^4\text{-H}_2$ ,  $\text{C}^5\text{-H}_2$ ,  $\text{CH-CH}_3$ ), 6.46 (s, 2H, Ar-H), 6.99 (s, 2H, Ar-H), 7.14 (t,  $^3J_{\text{H-H}} = 7.7$  Hz, 2H, Ar-H), 7.47 (t,  $^3J_{\text{H-H}} = 7.5$  Hz, 1H, Ar-H), 7.86 (d,  $^3J_{\text{H-H}} = 7.2$  Hz, 2H, Ar-H), 18.84 (d,  $^3J_{\text{H-P}} = 1.5$  Hz,  $\text{Ru=CH-Ph}$ ).

$^{13}\text{C}\{-^1\text{H}\}$  NMR ( $\text{CD}_2\text{Cl}_2$ , 100.6 MHz, 298 K)  $\delta$  (ppm) = 18.7 (Mes- $\text{CH}_3$ ), 20.4 (Mes- $\text{CH}_3$ ), 21.2 (Mes- $\text{CH}_3$ ), 21.4 (Mes- $\text{CH}_3$ ), 24.1 (d,  $^3J_{\text{C-P}} = 4.0$  Hz,  $\text{CH-CH}_3$ ), 51.9 (d,  $^4J_{\text{C-P}} = 4$  Hz,  $\text{C}^4$ ), 52.3 (d,  $^4J_{\text{C-P}} = 5.5$  Hz,  $\text{C}^5$ ), 69.5 (d,  $^2J_{\text{C-P}} = 1.8$  Hz,  $\text{CH-CH}_3$ ), 127.8 (Ar-CH), 129.7 (Ar-CH), 129.9 (Ar-CH), 130.6 (Ar-CH), 132.3 (Ar-CH), 135.5 (Ar-C), 137.4 (Ar-C), 137.5 (Ar-C), 138.4 (Ar-C), 138.7 (Ar-C), 139.5 (Ar-C), 151.5 (d,  $^3J_{\text{C-P}} = 7.2$  Hz, Ar-C), 218.9 (d,  $^2J_{\text{C-P}} = 138.4$  Hz,  $\text{C}^{\text{carbene}}$ ), 309.6 (d,  $^2J_{\text{C-P}} = 15.2$  Hz,  $\text{Ru=CH-Ph}$ ).

$^{31}\text{P}\{-^1\text{H}\}$  NMR ( $\text{CD}_2\text{Cl}_2$ , 162 MHz, 298K)  $\delta$  (ppm) = 125.4.

Anal. calcd for  $\text{C}_{37}\text{H}_{54}\text{Cl}_2\text{N}_2\text{O}_3\text{PRu}$ : C, 57.14; H, 7.00; N, 3.60. Found: C, 57.15; 7.26; 3.85.

### Dichloro- $\{N,N'$ -bis[2,4,6-(trimethyl)phenyl]imidazolin-2-ylidene\}(benzylidene) (triethylphosphite) ruthenium (1b)

Using 150mg of **G-III** (0.205 mmol), the procedure afforded 104.0 mg (70%) of the analytically pure product as a green powder.

$^1\text{H}$  NMR ( $\text{CD}_2\text{Cl}_2$ , 400 MHz, 298K)  $\delta$  (ppm) = 0.91 (t,  $^3J_{\text{H-H}} = 7.0$  Hz, 9H,  $\text{CH}_2\text{-CH}_3$ ), 2.10 (s, 3H, Mes- $\text{CH}_3$ ), 2.21 (s, 6H, Mes- $\text{CH}_3$ ), 2.30 (s, 3H, Mes- $\text{CH}_3$ ), 2.61 (s, 6H, Mes- $\text{CH}_3$ ), 3.36 (qd,  $^3J_{\text{H-H}} = 7.2$  Hz,  $^3J_{\text{H-P}} = 7.2$  Hz, 6H,  $\text{CH}_2\text{-CH}_3$ ), 3.90-3.96 (m, 2H,  $\text{C}^4\text{-H}_2$ ), 4.04-4.09 (m, 2H,  $\text{C}^5\text{-H}_2$ ), 6.49 (s, 2H, Ar-H), 6.96 (s, 2H, Ar-H), 7.17 (t,  $^3J_{\text{H-H}} = 7.8$  Hz, 2H, Ar-H), 7.50 (t,  $^3J_{\text{H-H}} = 7.3$  Hz, 1H, Ar-H), 7.86 (d,  $^3J_{\text{H-H}} = 7.6$  Hz, 2H, Ar-H), 18.77 (d,  $^2J_{\text{H-P}} = 1.9$  Hz,  $\text{Ru=CH-Ph}$ ).

$^{13}\text{C}\{-^1\text{H}\}$  NMR ( $\text{CD}_2\text{Cl}_2$ , 75.5 MHz, 298 K)  $\delta$  (ppm) = 16.3 (d,  $^3J_{\text{C-P}} = 6.6$  Hz,  $\text{CH}_2\text{-CH}_3$ ), 18.6 (Mes- $\text{CH}_3$ ), 20.5 (Mes- $\text{CH}_3$ ), 21.2 (Mes- $\text{CH}_3$ ), 21.3 (Mes- $\text{CH}_3$ ), 52.0 (d,  $^4J_{\text{C-P}} = 4.0$  Hz,  $\text{C}^4$ ), 52.2 (d,  $^4J_{\text{C-P}} = 5.4$  Hz,  $\text{C}^5$ ), 61.0 (d,  $^2J_{\text{C-P}} = 1.4$  Hz,  $\text{CH}_2\text{-CH}_3$ ), 127.9 (Ar-CH), 129.7 (Ar-CH), 130.5 (Ar-CH), 130.8 (Ar-CH), 132.2 (Ar-CH), 137.4 (Ar-C), 138.4 (Ar-C), 139.0 (Ar-C), 139.8 (Ar-C), 151.6 (d,  $^3J_{\text{C-P}} = 6.5$  Hz, Ar-C), 218.9 (d,  $^2J_{\text{C-P}} = 136.0$  Hz,  $\text{C}^{\text{carbene}}$ ), 309.3 (d,  $^2J_{\text{C-P}} = 17.7$  Hz,  $\text{Ru=CH-Ph}$ ).

$^{31}\text{P}\{-^1\text{H}\}$  NMR ( $\text{CD}_2\text{Cl}_2$ , 162 MHz, 298K)  $\delta$  (ppm) = 130.8.

Anal. calcd for  $\text{C}_{34}\text{H}_{47}\text{Cl}_2\text{N}_2\text{O}_3\text{PRu}$ : C, 55.58; H, 6.45; N, 3.81. Found: C, 55.97; H, 6.41; N, 4.17.

# NMR spectra of the complexes

## $^1\text{H}$ NMR ( $\text{CDCl}_3$ ) of **1a**

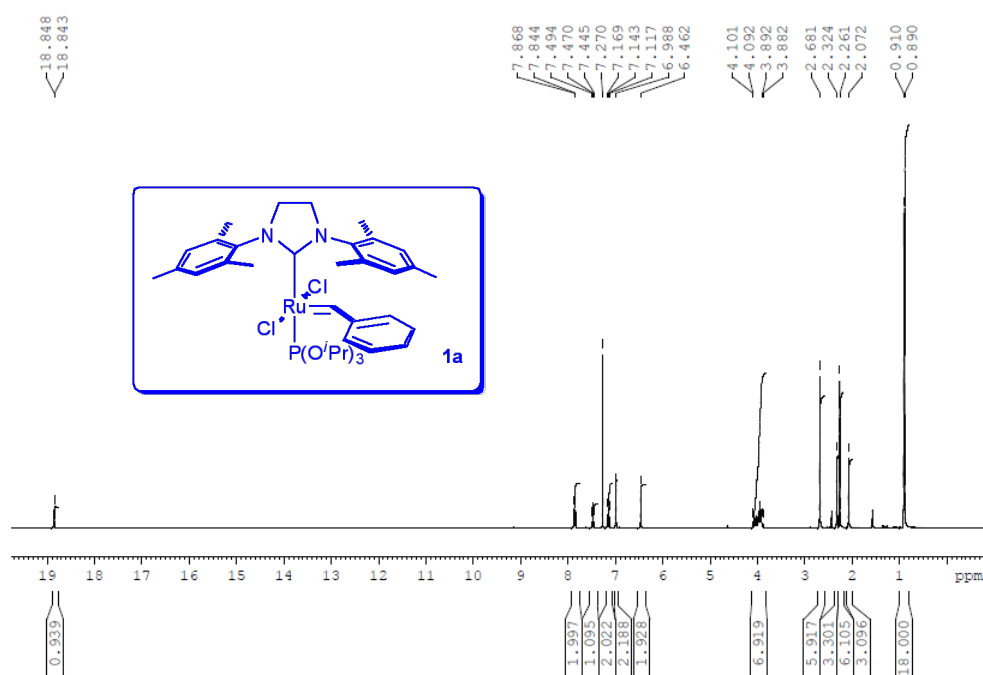

## $^{13}\text{C}\{-^1\text{H}\}$ NMR ( $\text{CD}_2\text{Cl}_2$ ) of **1a**

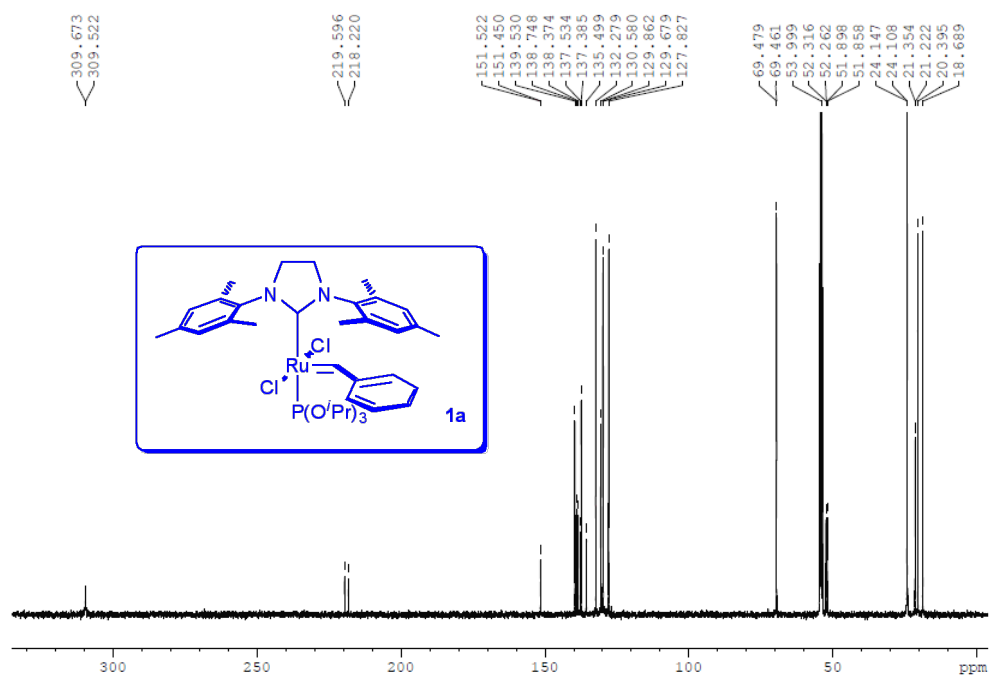

**$^{31}\text{P}\{-^1\text{H}\}$  NMR ( $\text{CDCl}_3$ ) of 1a**

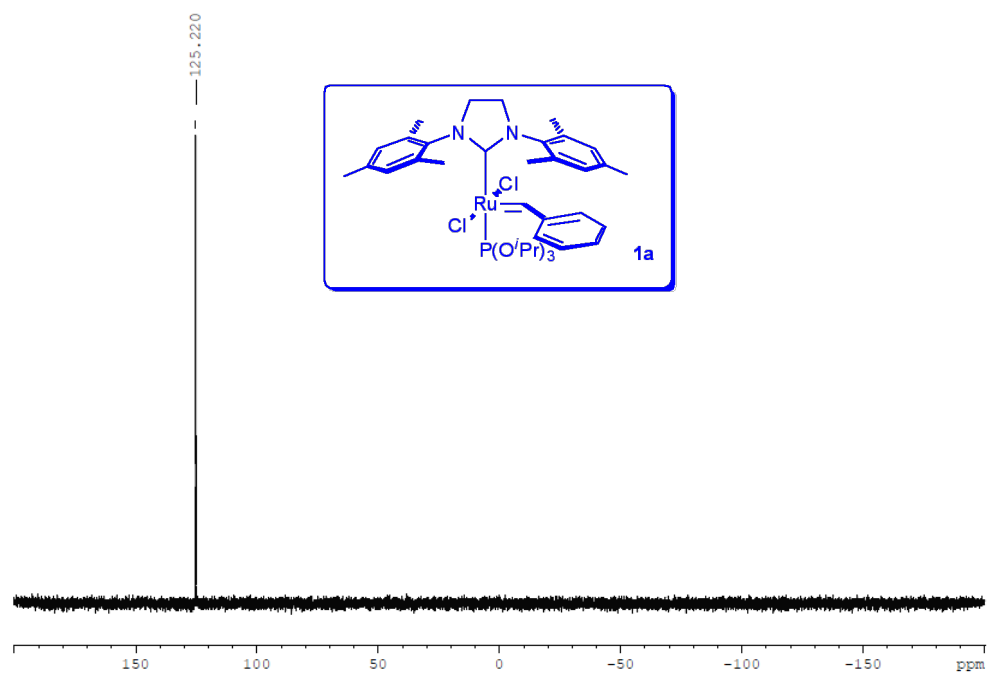

**$^1\text{H}$  NMR ( $\text{CD}_2\text{Cl}_2$ ) of 1b**

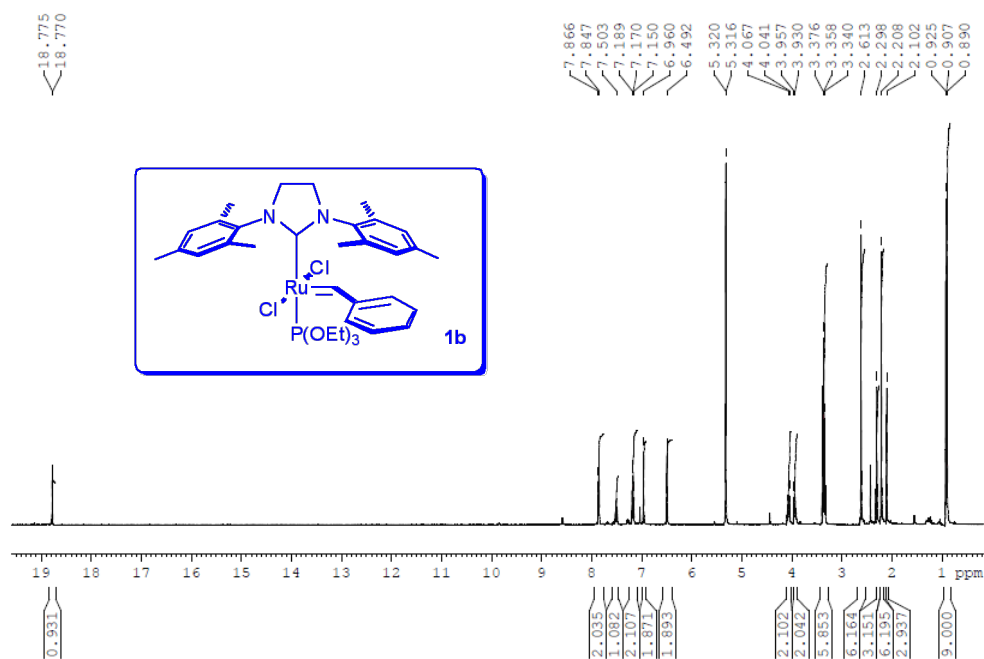

**$^{13}\text{C}\{-^1\text{H}\}$  NMR ( $\text{CD}_2\text{Cl}_2$ ) of **1b****

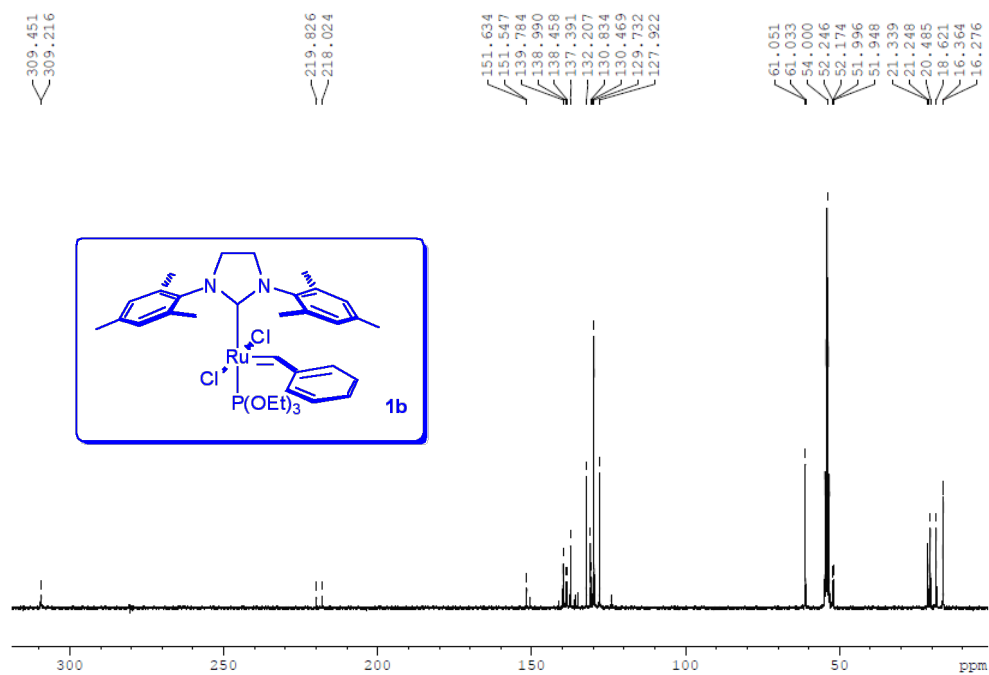

**$^{31}\text{P}\{-^1\text{H}\}$  NMR ( $\text{CD}_2\text{Cl}_2$ ) of **1b****

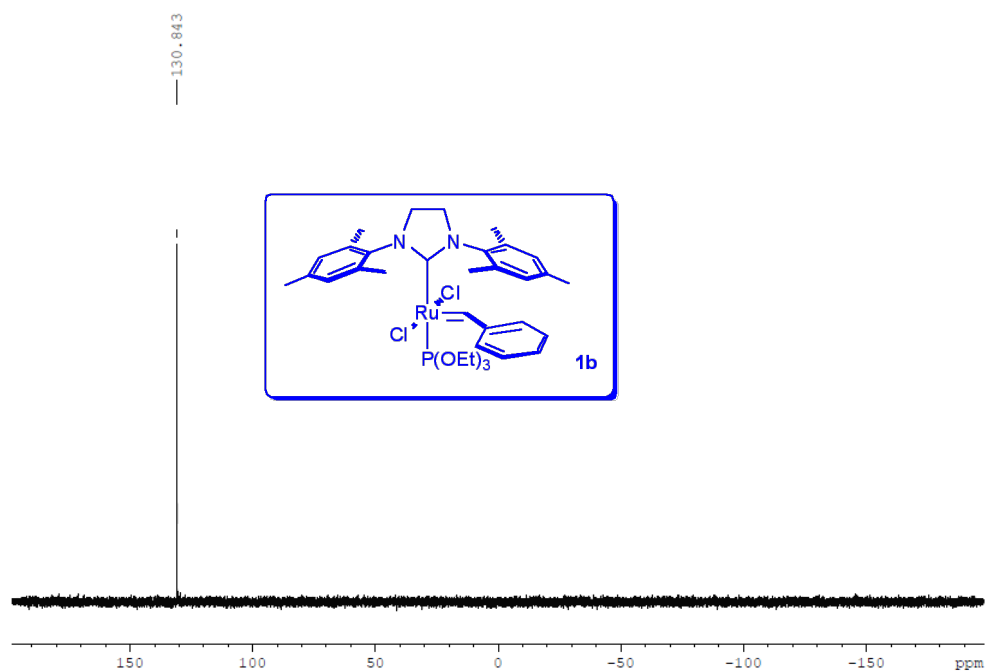

# NMR spectra of the Metathesis products

## <sup>1</sup>H NMR (CDCl<sub>3</sub>) of 3 (Table 2, Entry 1)

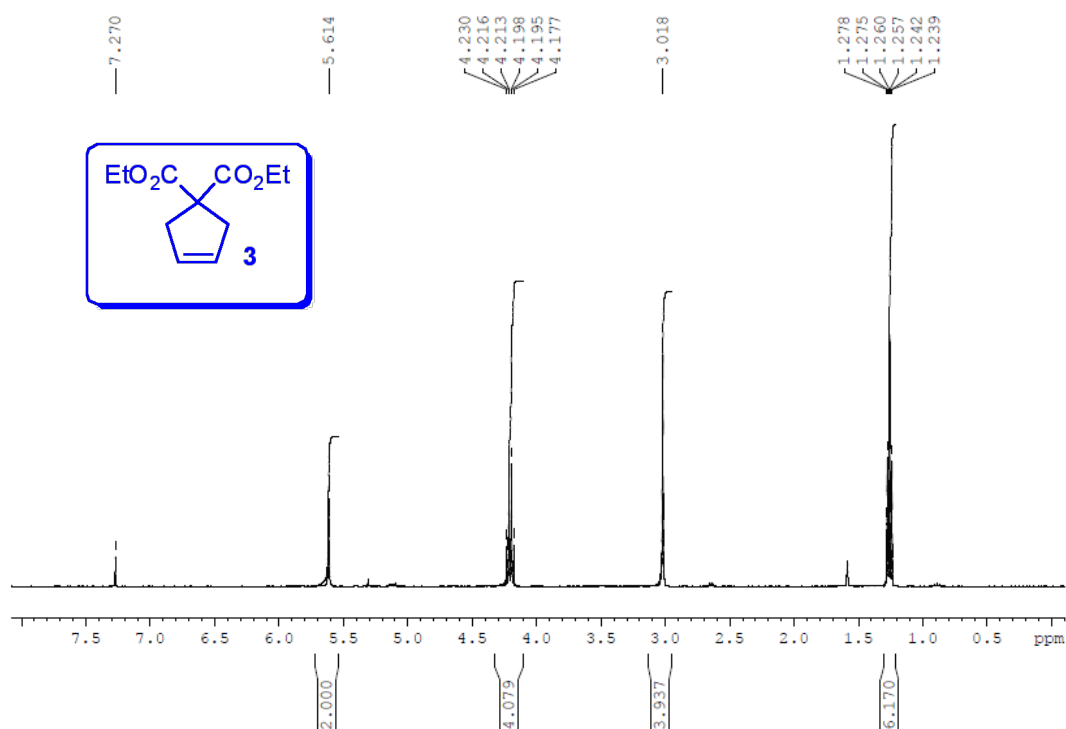

## <sup>1</sup>H NMR (CDCl<sub>3</sub>) of 9 (Table 2, Entry 2)

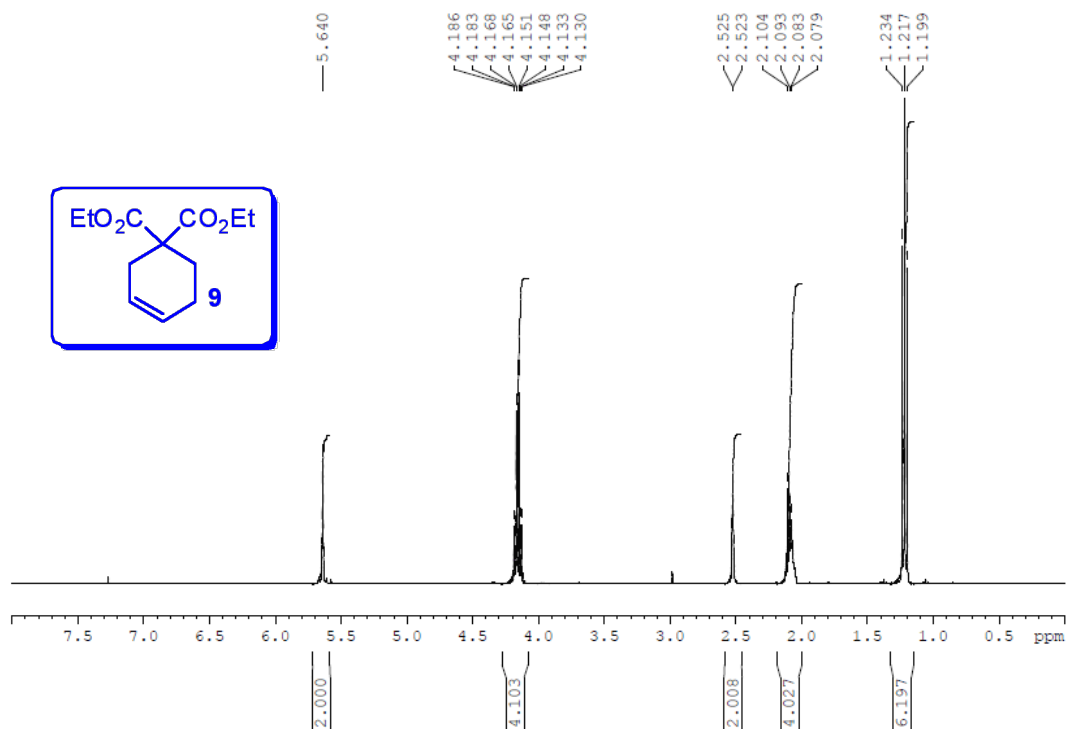

**<sup>1</sup>H NMR (CDCl<sub>3</sub>) of 11 (Table 2, Entry 3)**

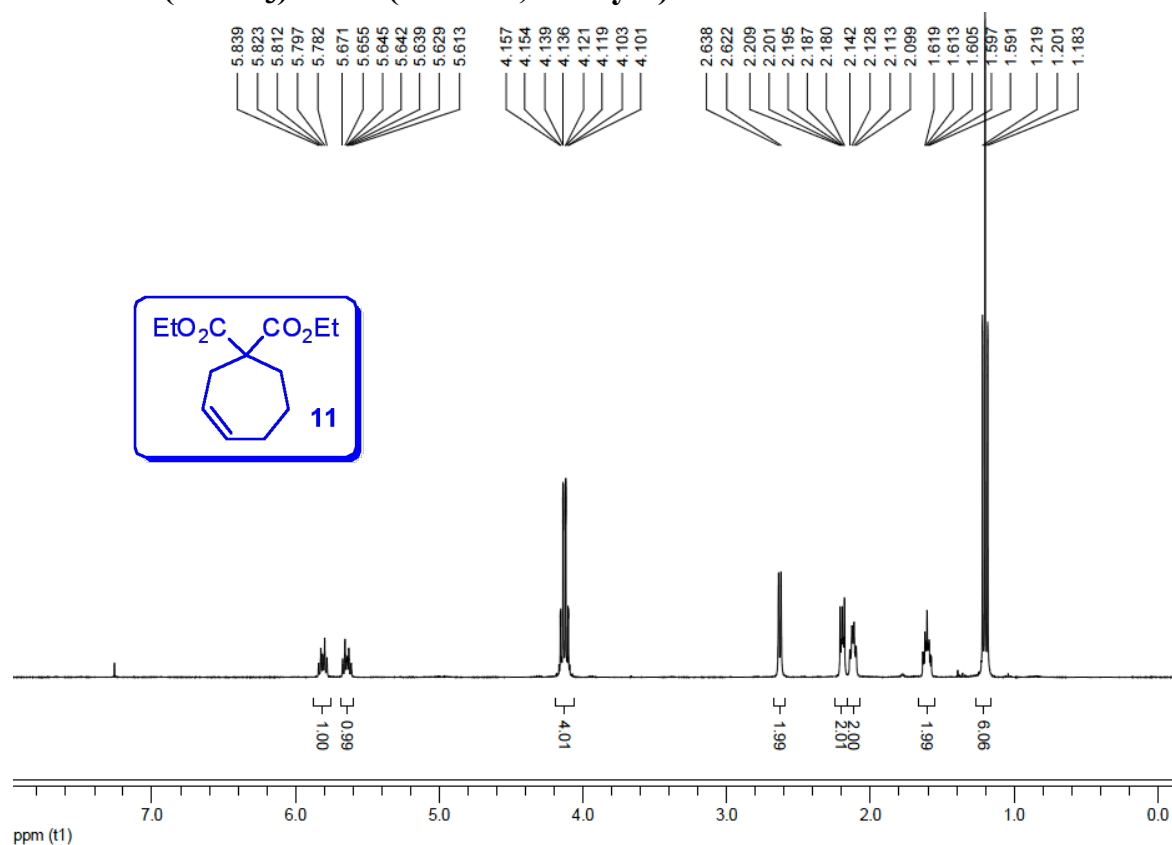

**<sup>1</sup>H NMR (CDCl<sub>3</sub>) of 13 (Table 2, Entry 4)**

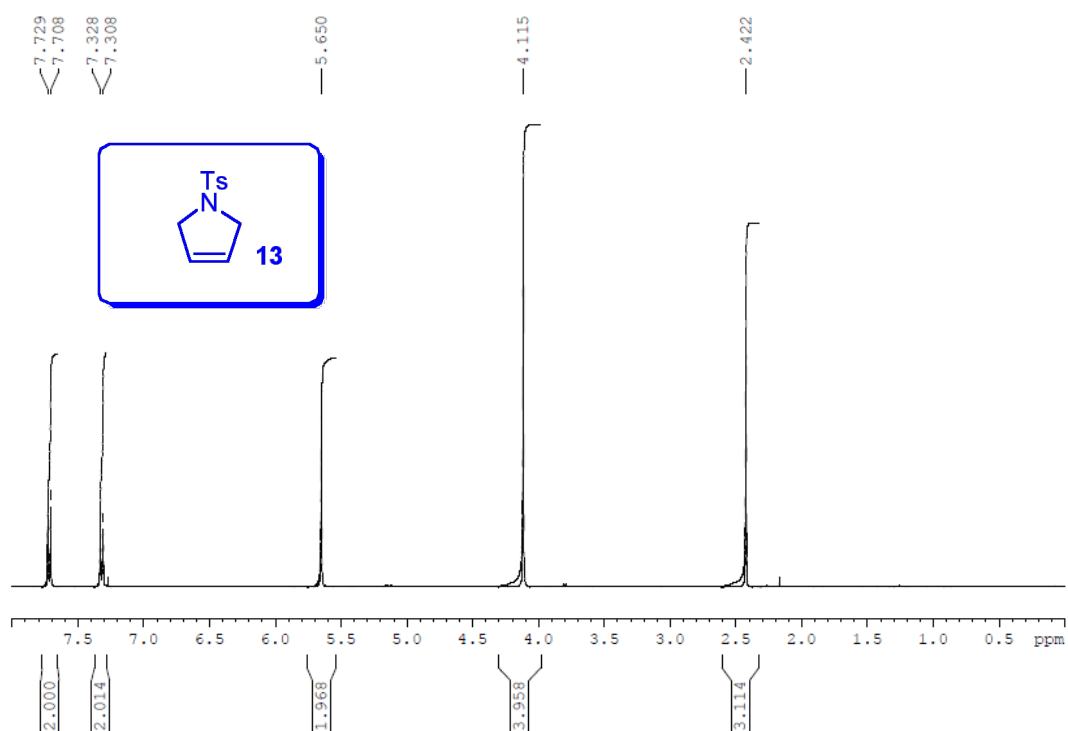

# <sup>1</sup>H NMR (CDCl<sub>3</sub>) of 15 (Table 2, Entry 5)

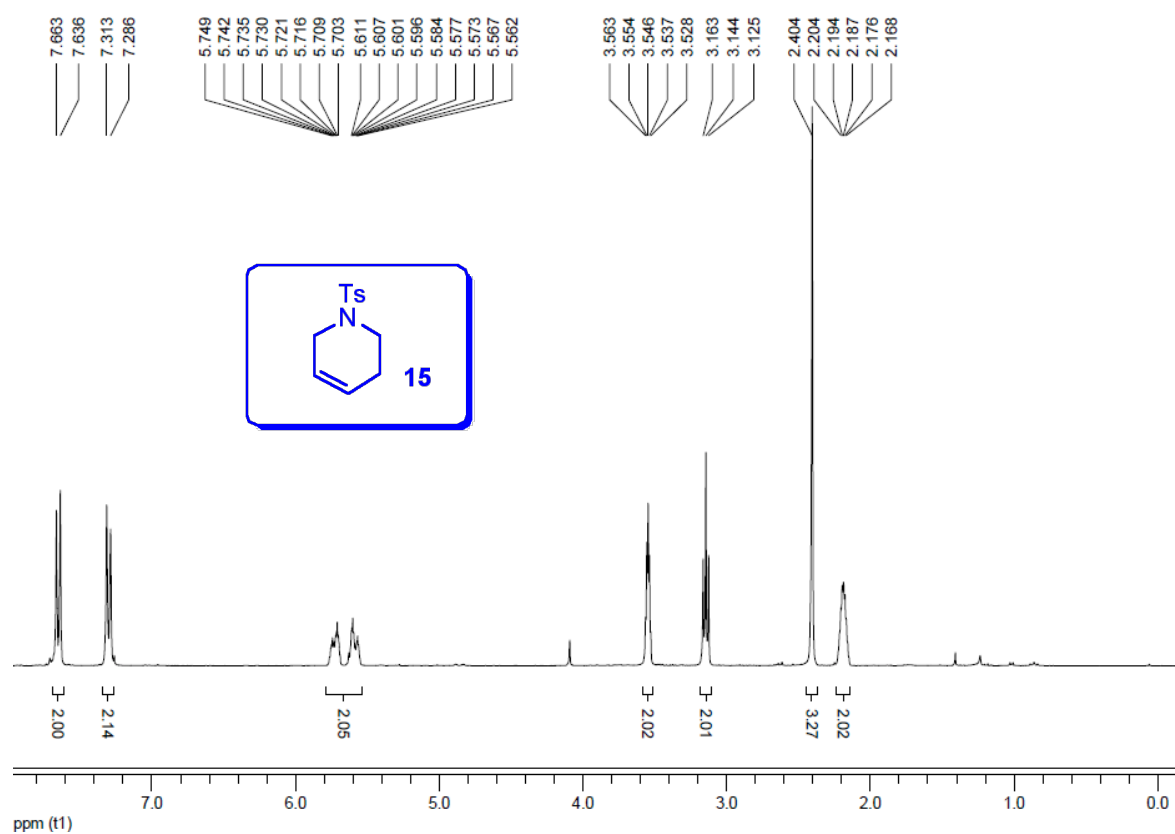

# <sup>1</sup>H NMR (CDCl<sub>3</sub>) of 5 (Table 2, Entry 6)

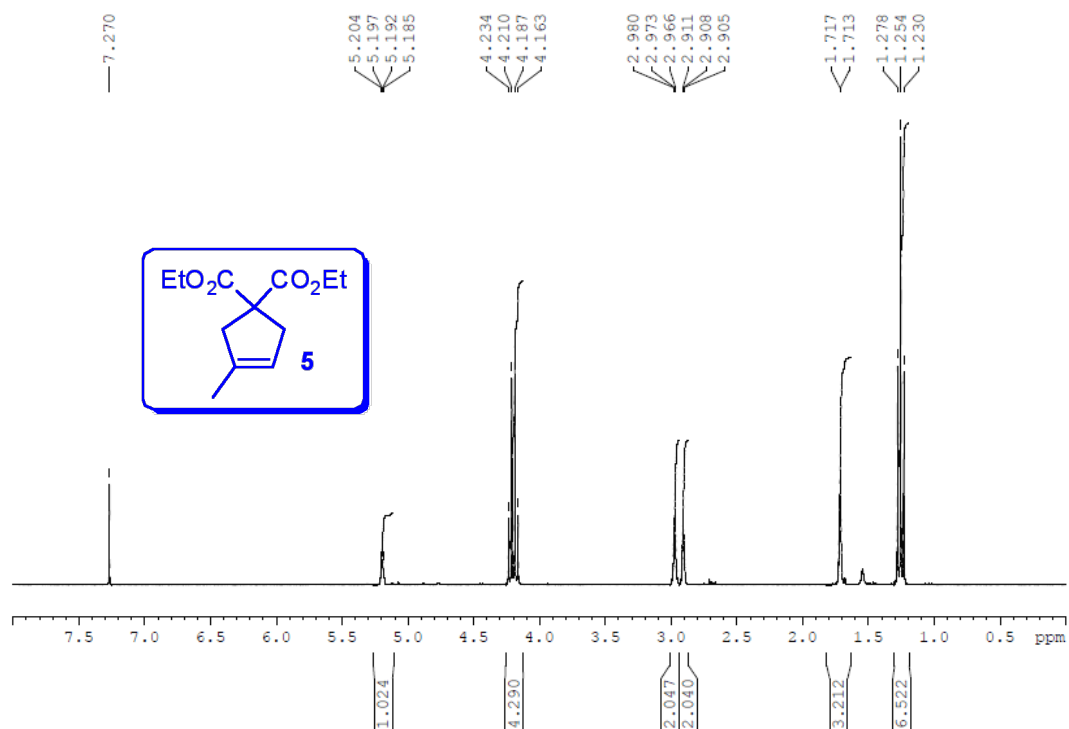

# <sup>1</sup>H NMR (CDCl<sub>3</sub>) of 17 (Table 2, Entry 7)

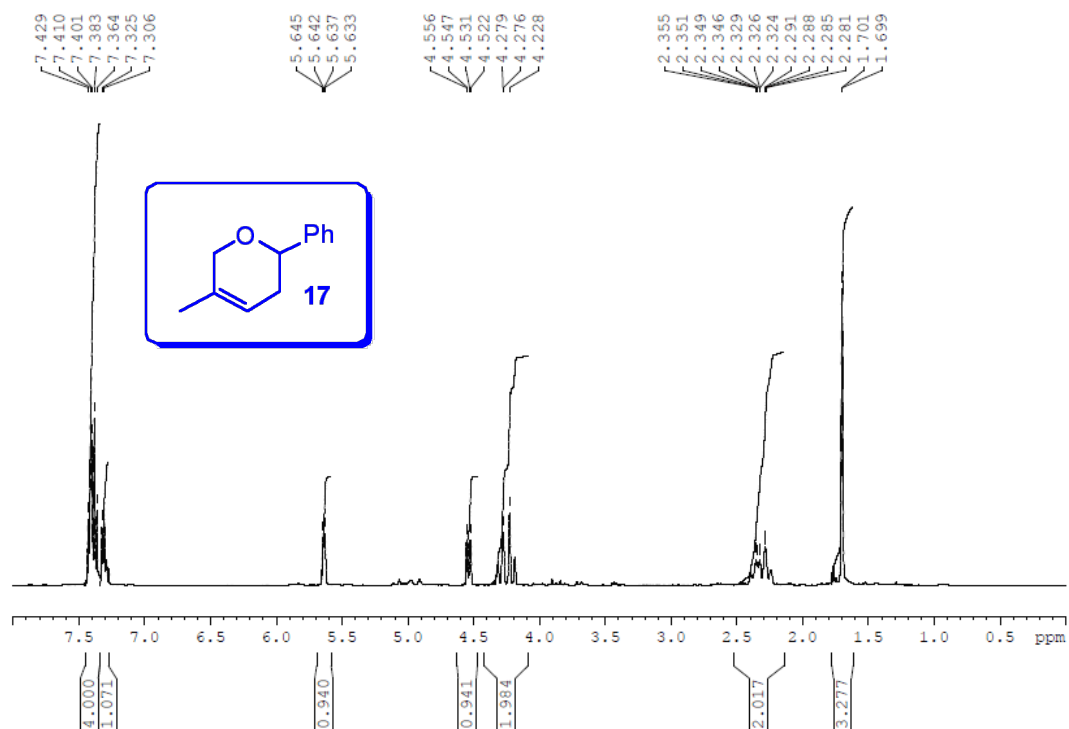

# <sup>1</sup>H NMR (CDCl<sub>3</sub>) of 7 (Table 2, Entry 8)

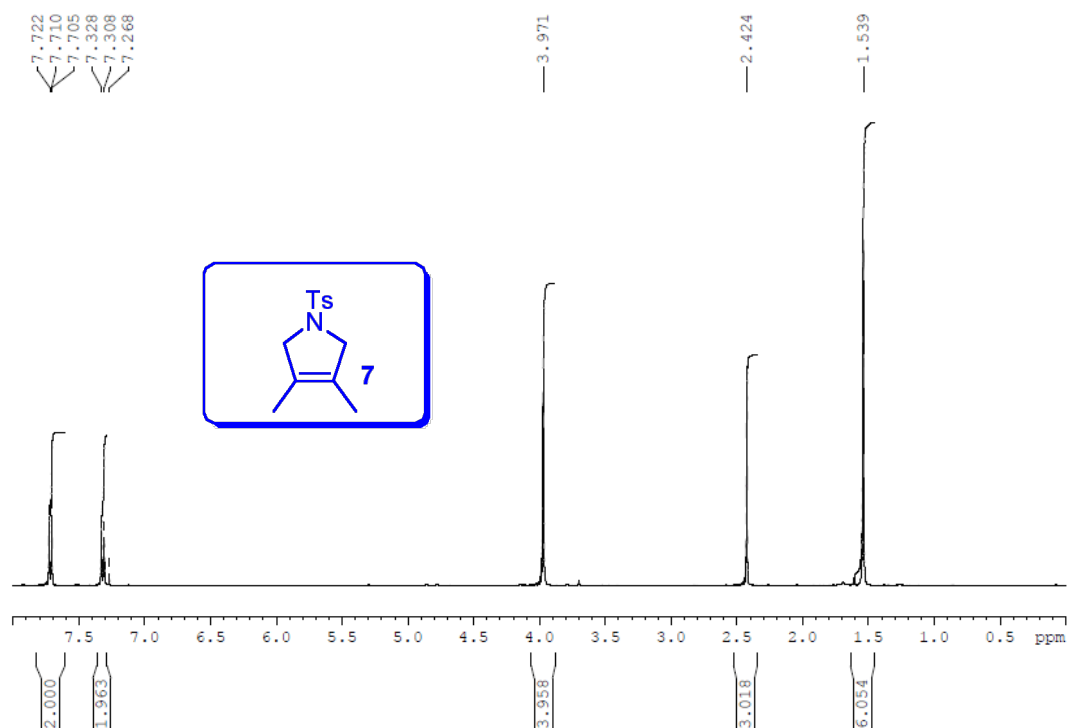

# <sup>1</sup>H NMR (CDCl<sub>3</sub>) of 19 (Table 2, Entry 9)

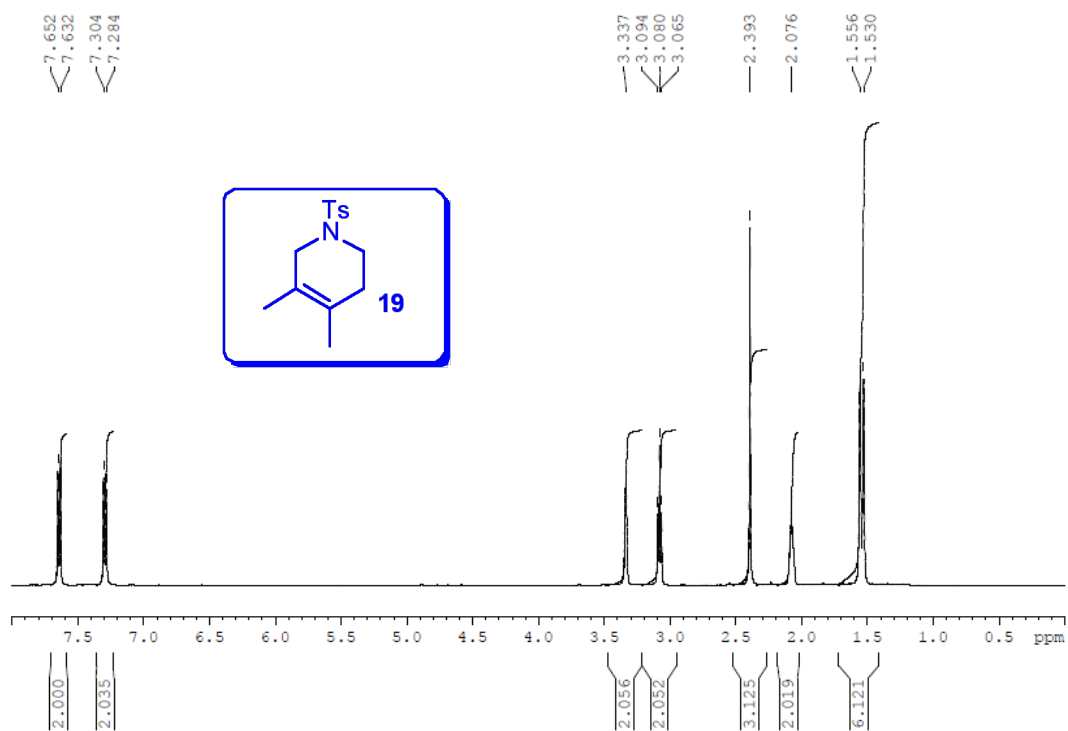

# <sup>1</sup>H NMR (CDCl<sub>3</sub>) of 21 (Table 2, Entry 10)

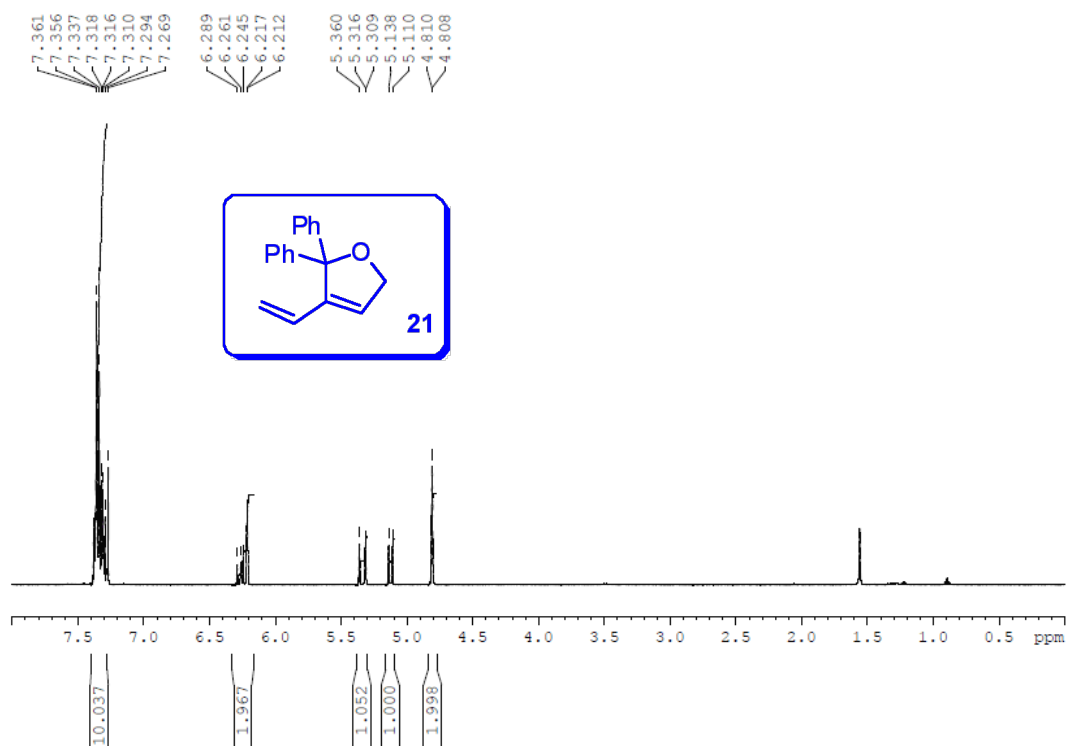

# <sup>1</sup>H NMR (CDCl<sub>3</sub>) of 23 (Table 2, Entry 11)

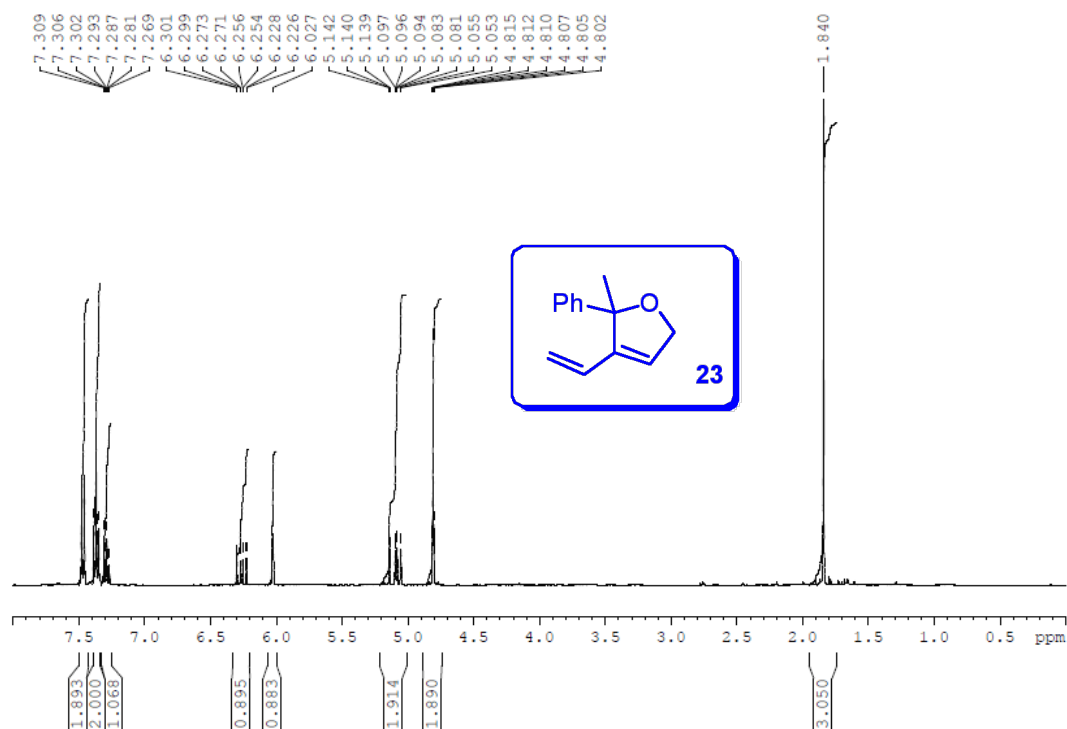

# <sup>1</sup>H NMR (CDCl<sub>3</sub>) of 25 (Table 2, Entry 12)

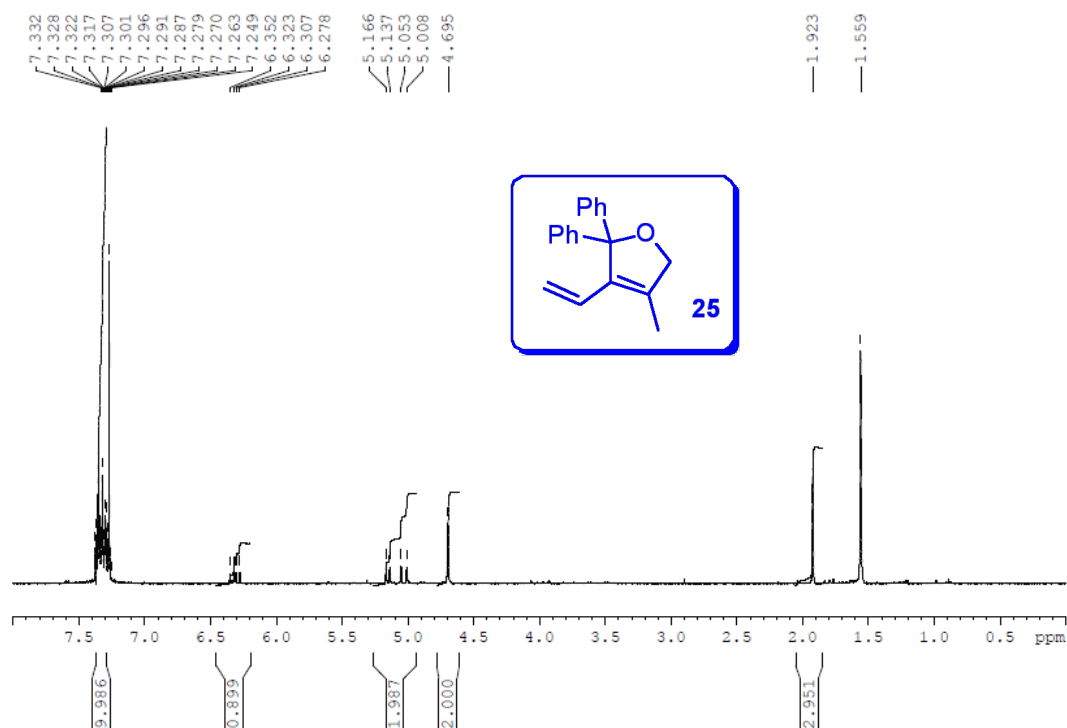

**<sup>1</sup>H NMR (CDCl<sub>3</sub>) of 27 (Table 2, Entry 13)**

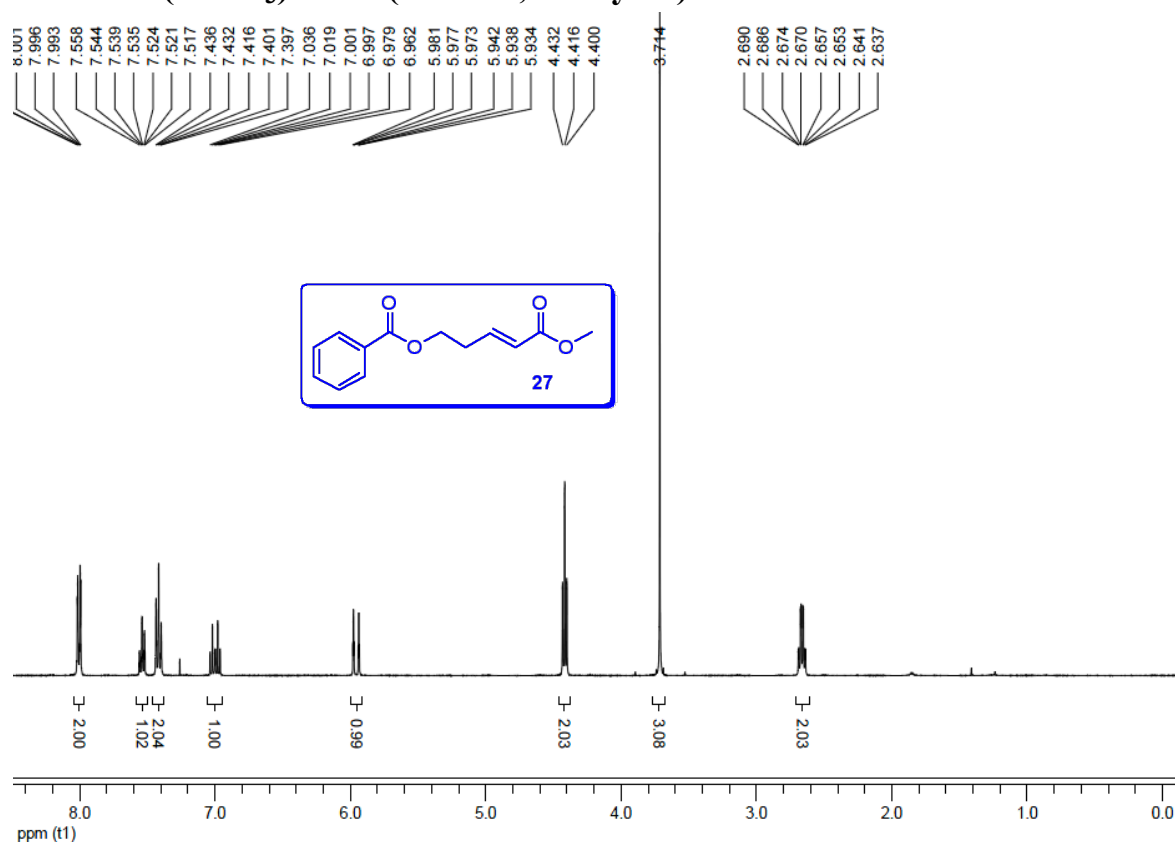

**<sup>1</sup>H NMR (CDCl<sub>3</sub>) of 29 (Table 2, Entry 14)**

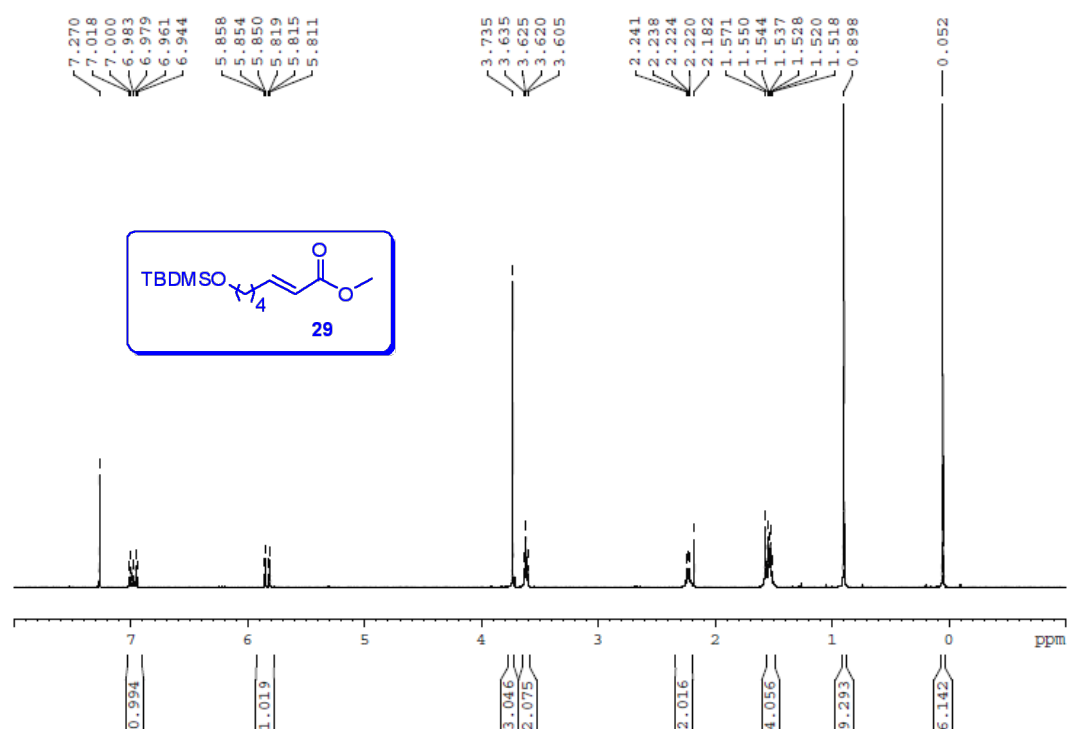

## References

- 1 T. A. Kirkland, R. H. Grubbs, *J. Org. Chem.* **1997**, *62*, 7310 – 7318.
- 2 H. Clavier, S. P. Nolan, *Chem. Eur. J.* **2007**, *13*, 8029 – 8036
- 3 S. Bien, D. Ovadia, *J. Chem. Soc. Perkin Trans. 1* **1974**, 333 – 336
- 4 Q. Yao, Y. Zhang, *J. Am. Chem. Soc.* **2004**, *126*, 74–75
- 5 Y. Terada, M. Mitsuhiro, A. Nishida, *Angew. Chem. Int. Ed.* **2004**, *43*, 4063 –4067.
- 6 J. A. Marco, M. Carda, S. Rodriguez, E. Castillo, M. N. Kneeteman, *Tetrahedron* **2003**, *59*, 4085 –4101.
- 7 Tokuyasu, T.; Kunikawa, S.; McCullough, K. J.; Masuyama, A.; Nojima, M. *J. Org. Chem.* **2005**, *70*, 251-260.
- 8 K. D. Schleicher, T. F. Jamison, *Org. Lett.* **2007**, *9*, 875-878.
- 9 Fürstner, A.; Ackermann, L.; Gabor, B.; Goddard, R.; Lehmann, C. W.; Mynott, R.; Stelzer, F. Thiel, O. R. *Chem. Eur. J.* **2001**, *7*, 3236-3253.
- 10 Rix, D.; Caijo, F.; Laurent, I.; Boeda, F.; Clavier, H.; Nolan, S. P.; Mauduit, M. *J. Org. Chem.* **2008**, *73*, 4225-4228.
- 11 Michrowska, A.; Bujok, R.; Harutyunyan, S.; Sashuk, V.; Dolgonos, G.; Grela, K. *J. Am. Chem. Soc.* **2004**, *126*, 9318-9325.
